# Supplementary material for: Insular and caudate lesions release abnormal yawning in stroke patients
Source: PubMed Central journal article supplement (PMC4341028; doi:10.1007/s00429-013-0684-6), 2013-12-12
Supplement: 429_2013_684_MOESM1_ESM.pdf [file 429_2013_684_MOESM1_ESM.pdf]

## Supplementary Table 1

| Patient No | Vigilance (GCS) | medication                                                                                                                                             |
|------------|-----------------|--------------------------------------------------------------------------------------------------------------------------------------------------------|
| 1.         | 11              | phenprocoumon, perindopril, <b>verapamil</b> (occ), acetylcystein, <b>esomeprazol</b> (occ), levothyroxin, mebeverin, <b>trimipramin</b> (freq)        |
| 2.         | 14              | <b>atenolol</b> (freq)                                                                                                                                 |
| 3.         | 11              | none                                                                                                                                                   |
| 4.         | 15              | none                                                                                                                                                   |
| 5.         | 12              | aspirin, clopidogrel, <b>bisoprolol</b> (freq), perindopril, metformin and glibenclamid, pravastatin, <b>nicorandil</b> (freq), <b>omeprazol</b> (occ) |
| 6.         | 9               | <b>enalapril</b> (occ), <b>carvedilol</b> (occ), <b>felodipin</b> (occ)                                                                                |
| 7.         | 15              | clopidogrel                                                                                                                                            |
| 8.         | 15              | phenprocoumon, <b>bisoprolol</b> (freq), atorvastatin                                                                                                  |
| 9.         | 9               | phenprocoumon, <b>metoprolol</b> (very freq), <b>enalapril</b> (occ), isosorbide dinitrate, <b>nicorandil</b> (freq)                                   |
| 10.        | 15              | <b>methyl phenidate</b> (occ), <b>sertraline</b> (freq)                                                                                                |
